# Supplementary material
Source: PubMed Central journal article supplement (PMC4577961)

Supplementary material for

**Design of protease activated optical contrast agents that exploit a latent lysosomotropic effect for use in fluorescence-guided surgery**

Leslie O. Ofori<sup>1</sup>, Nimali P. Withana<sup>1</sup>, Tyler R. Prestwood<sup>2</sup>, Martijn Verdoes<sup>1,6</sup>, Jennifer J. Brady<sup>4</sup>, Monte M. Winslow<sup>1,4</sup>, Jonathan Sorger<sup>5</sup> and Matthew Bogyo<sup>1,3\*</sup>

<sup>1</sup>Departments of Pathology, <sup>2</sup>Medicine, <sup>3</sup>Microbiology & Immunology, and <sup>4</sup>Genetics, Stanford University School of Medicine. 300 Pasteur Drive, Stanford, CA, 94035, USA.

<sup>5</sup>Intuitive Surgical Inc. 1020 Kifer Road, Sunnyvale, CA, 94086, USA.

<sup>6</sup>Present address: Department of Tumor Immunology, Radboud Institute for Molecular Life Sciences, RadboudUMC Nijmegen, The Netherlands.

\*Correspondence: mbogyo@stanford.edu

**This PDF file includes:**

Supplementary Figure 1

Supplementary Material and Methods

Supplementary Schemes 1 and 2

Compound Characterization

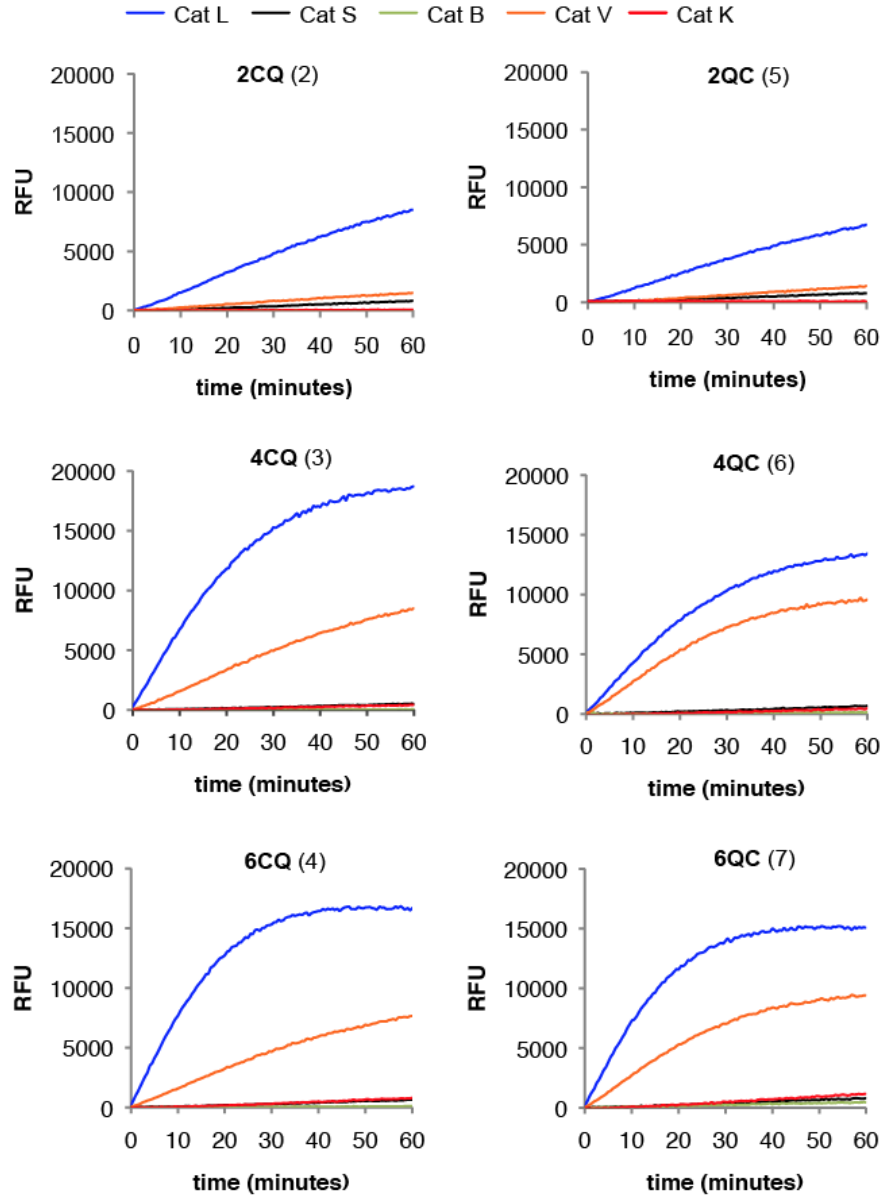

**Supplementary Figure 1.** Enzymatic turnover of quenched fluorescence *nCQ/nQC* substrates using recombinant cysteine cathepsins (10nM each in citric buffer pH 5.5): Cat L (blue), Cat S (black), Cat B (green), Cat V (orange) and K (red), in a total volume of 100  $\mu$ l. The increase in Cy5 fluorescence was detected at the wavelengths 640/679nm at 37  $^{\circ}$ C.

## Supplementary Materials and Methods

All resins and reagents were purchased from commercial suppliers and used without further purifications. Water used for reactions and aqueous workup was glass-distilled from a deionized water feed. Reagent grade solvents were used for all non-aqueous extractions. All water-sensitive reactions were performed in anhydrous solvents under positive pressure of argon. Reactions were analyzed by LC-MS using an API 150EX single-quadrupole mass spectrometer (Applied Biosystems). Synthesized compounds were purified via Reverse-phase HPLC with an ÅKTA explorer 100 (Amersham Pharmacia Biotech) using C18 columns. Compounds were eluted with a gradient of doubly distilled water and acetonitrile containing 1 % trifluoroacetic acid as solvents. NMR spectra were recorded on a Varian 400 MHz (400/100), Varian 500 MHz (500/125) equipped with a pulsed field gradient accessory and processed using MestReNova NMR processing software. Chemical shifts ( $\delta$ ) are reported in parts per million (ppm) downfield from tetramethylsilane and referenced to the residual protium signal in the NMR solvents ( $\text{CDCl}_3$ ,  $\delta = 7.25$ ). Data are reported as follows: chemical shift, multiplicity (s = singlet, d = doublet, t = triplet, m = multiplet and q = quartet), coupling constant ( $J$ ) in Hertz (Hz) and integration. Cells were cultured in Dulbecco's modified Eagle's medium (DMEM (GIBCO Cat# 11995)), supplemented with 10 % fetal bovine serum (FBS) and 100 units/ml % penicillin and 100  $\mu\text{g}/\text{ml}$  streptomycin.

## Compound synthesis

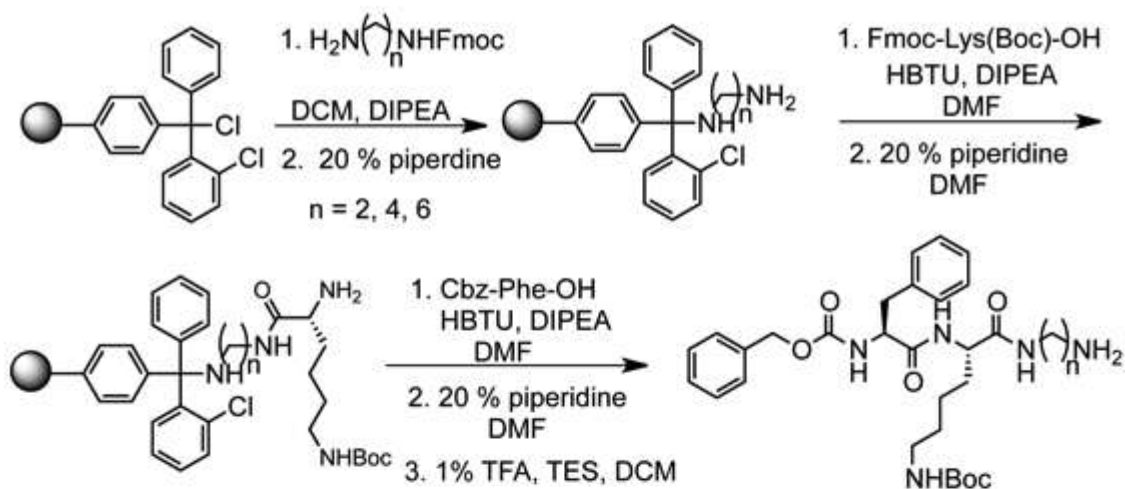

(1a) **LO1151a** :  $n = 2$   
 (1b) **LO1151b** :  $n = 4$   
 (1c) **LO1151c** :  $n = 6$

1a. Sulfo-QSY21-NHS  
or  
Cy5-NHS, DMSO, DIPEA  
1b. Cy5-NHS  
or  
Sulfo-QSY21-NHS, DMSO, DIPEA  
2. 30 % TFA, DCM

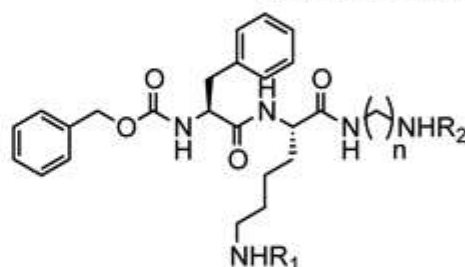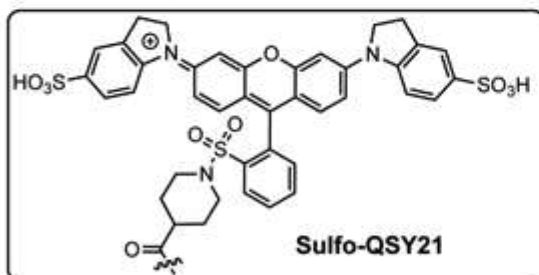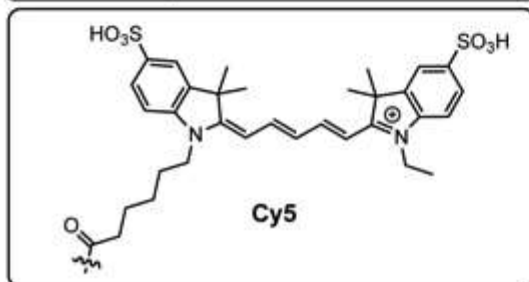

6-member library of non-covalent quenched fluorescence activity based probes

**non-lysosomotropic probes:  $n\text{CQ}$**

- (2) **2CQ**:  $\text{R}_1 = \text{Cy5}, \text{R}_2 = \text{QSY21-sulfo}, n = 2$   
 (3) **4CQ**:  $\text{R}_1 = \text{Cy5}, \text{R}_2 = \text{QSY21-sulfo}, n = 4$   
 (4) **6CQ**:  $\text{R}_1 = \text{Cy5}, \text{R}_2 = \text{QSY21-sulfo}, n = 6$

**Latent lysosomotropic effect probes:  $n\text{QC}$**

- (5) **2QC**:  $\text{R}_1 = \text{QSY21-sulfo}, \text{R}_2 = \text{Cy5}, n = 2$   
 (6) **4QC**:  $\text{R}_1 = \text{QSY21-sulfo}, \text{R}_2 = \text{Cy5}, n = 4$   
 (7) **6QC**:  $\text{R}_1 = \text{QSY21-sulfo}, \text{R}_2 = \text{Cy5}, n = 6$

**Supplementary Scheme 1.** Synthesis of a 6-membered library of non-covalent quenched fluorescent activity based probes using a combination of solid and solution phase synthesis

**Intermediates 1a, 1b, and 1c.** 0.5 g of 2-chlorotrityl chloride resin (0.84 mmol/g loading) was weighed into three separate solid phase reaction vessels. The reaction vessels were labeled from a to c with a permanent marker. Dichloromethane (DCM) was added to suspend the resins and then vessels were agitated for 15 minutes using a laboratory shaker. After washing 2 times with DCM, mono-Fmoc-1,3-ethanediamine (0.35 g, 1.26 mmol), mono-Fmoc-1,4-butanediamine (0.39 g, 1.26 mmol), and mono-Fmoc-1,6-hexanediamine (0.43 g, 1.26 mmol) in 3 mL of DCM were added to the resin in vessels a, b, and c respectively. Diisopropylthylamine (DIPEA, 3eq) was then added to each vessel and the reaction was agitated for a period of 30 minutes at room temperature. The resin was washed with DCM and then suspended in methanol for 10 minutes in order to deactivate any unreacted trityl-chloride. Fmoc deprotection was achieved by suspending the resin in a solution of 20 % piperidine in DMF for duration of 1 hour, followed by 3 times wash with DCM and DMF respectively. Next, the first amino acid Fmoc-Lys(Boc)-OH (0.58 g, 1.26 mmol) was coupled to the resin using HBTU (0.48 g, 1.26 mmol) and DIPEA (0.17 g, 1.26 mmol) in 3 mL of DMF and rotating the mixture for 2 h. Following a wash cycle, Fmoc deprotection was accomplished using 5 mL of 20% piperidine in DMF for 1 hour, followed again by the wash cycle. The remaining amino acid Cbz-Phe-OH was similarly coupled to the peptide on the resin. The resin was then treated with a solution 1 % trifluoroacetic acid in DCM to selectively cleave the peptide (with a from the resin resulting in the products with  $\omega$ -N-Boc-protected lysine. The solvent was removed from each cleaved product by co-evaporation with toluene, resulting in the intermediate substrates **1a**, **1b** and **1c** respectively (Scheme 1). Each product was then further purified by Reversed phase preparative HPLC followed by lyophilization to afford the final peptides as white powder in greater than 95 % purity.

Probes **2CQ** (2), **4CQ** (3), **6CQ** (4). In separate 1.5 mL eppendorf tubes, intermediates **1a** (2.0 mg, 3.51  $\mu$ mol, 1 equiv), **1b** (2.0 mg, 3.35  $\mu$ mol, 1 equiv) or **1c** (2.0 mg, 3.2  $\mu$ mol,

1 equiv) were dissolved in 100  $\mu$ L of DMSO. DIPEA (5 equiv) was added followed by QSY21-sulfo-NHS (1.1 equiv). The reaction was stirred for 1 hour at room temperature followed by purification of the product by HPLC. The solvent was removed by rotary evaporation after which the Boc-protection on the lysine was removed by treatment with 30 % TFA in DCM for 30 minutes. Following removal of the solvent, the product was lyophilized and then reacted with Cy5-NHS (1.1equiv) in DMSO with 5 equivalent of DIPEA (Supplementary Scheme 1). The final products were each purified by reverse phase HPLC to yield the non-lysosomotropic quenched fluorescence substrates *n*CQ, where *n* =, 2, 4, and 6 respectively, in greater than 95 % purity. LCMS: 2CQ (2) calculated for  $C_{99}H_{108}N_{10}O_{21}S_5^{2+}$ : 966.81; found; 966.8, HRMS: calculated for  $C_{99}H_{108}N_{10}O_{21}S_5^{2+}$ : 966.8159; found: 966.8121.  $^1H$  NMR (400 MHz, DMSO):  $\delta$  8.40 – 8.29 (m, 2H), 8.18 (d, *J* = 8.4 Hz, 1H), 8.04 – 7.92 (m, 2H), 7.84 (s, 1H), 7.81 (s, 2H), 7.73 (dd, *J* = 10.7, 5.6 Hz, 2H), 7.70 – 7.57 (m, 9H), 7.57 – 7.47 (m, 5H), 7.34 – 7.15 (m, 14H), 6.54 (t, *J* = 10.2 Hz, 7H), 6.29 (dd, *J* = 13.6, 7.9 Hz, 2H), 4.92 (s, 2H), 4.35 (dd, *J* = 9.5, 7.2 Hz, 4H), 4.30 – 4.22 (m, 1H), 4.10 (tdd, *J* = 12.7, 7.4, 5.6 Hz, 4H), 3.28 – 3.20 (m, 9H), 3.09 – 2.90 (m, 8H), 2.70 (d, *J* = 2.1 Hz, 1H), 2.69 – 2.64 (m, 1H), 2.34 – 2.32 (m, 1H), 2.02 (t, *J* = 6.6 Hz, 2H), 1.67 (s, 13H), 1.62 – 1.47 (m, 6H), 1.35 – 1.21 (m, 10H). LCMS: 4CQ (3) calculated for  $C_{101}H_{112}N_{10}O_{21}S_5^{2+}$ : 980.8; found; 980.6, HRMS: calculated for  $C_{101}H_{112}N_{10}O_{21}S_5^{2+}$ : 980.8315; found: 980.8264.  $^1H$  NMR (400 MHz, DMSO):  $\delta$  8.33 (t, *J* = 13.0 Hz, 2H), 8.18 (dd, *J* = 7.7, 1.1 Hz, 1H), 8.03 – 7.91 (m, 3H), 7.79 (s, 3H), 7.75 – 7.55 (m, 12H), 7.55 – 7.49 (m, 4H), 7.47 (d, *J* = 8.1 Hz, 1H), 7.35 – 7.11 (m, 15H), 6.54 (t, *J* = 12.5 Hz, 2H), 6.27 (dd, *J* = 14.0, 8.0 Hz, 2H), 4.90 (s, 2H), 4.41 – 4.29 (m, 4H), 4.29 – 4.18 (m, 1H), 4.19 – 3.95 (m, 6H), 3.29 – 3.12 (m, 9H), 3.04 – 2.80 (m, 8H), 2.67 (ddd, *J* = 8.8, 6.3, 5.4 Hz, 2H), 2.31 (dt, *J* = 3.5, 1.9 Hz, 1H), 2.00 (t, *J* = 7.0 Hz, 2H), 1.65 (s, 14H), 1.50 (dd, *J* = 11.2, 6.4 Hz, 6H), 1.36 – 1.17 (m, 16H). LCMS: 6CQ (4) calculated for  $C_{103}H_{116}N_{10}O_{21}S_5^{2+}$ : 994.8; found; 994.8, HRMS:

calculated for  $C_{103}H_{116}N_{10}O_{21}S_5^{2+}$ : 994.8472; found: 994.8444.  $^1H$  NMR (400 MHz, DMSO)  $\delta$  8.34 (t,  $J = 12.9$  Hz, 2H), 8.19 (d,  $J = 9.0$  Hz, 1H), 8.04 – 7.91 (m, 3H), 7.79 (s, 2H), 7.71 (t,  $J = 5.5$  Hz, 1H), 7.63 (ddd,  $J = 20.6, 10.2, 5.4$  Hz, 10H), 7.50 (dd,  $J = 17.0, 7.9$  Hz, 5H), 7.21 (ddt,  $J = 23.7, 21.2, 7.0$  Hz, 14H), 6.54 (t,  $J = 12.3$  Hz, 4H), 6.27 (dd,  $J = 13.7, 7.8$  Hz, 2H), 4.90 (s, 2H), 4.34 (t,  $J = 9.9$  Hz, 4H), 4.25 (dd,  $J = 10.2, 6.0$  Hz, 1H), 4.19 – 3.97 (m, 5H), 3.23 (dt,  $J = 17.2, 8.7$  Hz, 9H), 3.04 – 2.84 (m, 7H), 2.71 (d,  $J = 12.6$  Hz, 1H), 2.67 – 2.63 (m, 1H), 2.31 (dt,  $J = 3.7, 1.9$  Hz, 1H), 2.00 (t,  $J = 7.1$  Hz, 3H), 1.65 (s, 13H), 1.50 (t,  $J = 11.5$  Hz, 6H), 1.36 – 1.05 (m, 20H).

Probes **2QC** (5), **4QC** (6), **6QC** (7). In a separate 1.5 mL eppendorf tubes, intermediates **1a** (2.0 mg, 3.51  $\mu$ mol, 1 equiv), **1b** (2.0 mg, 3.35  $\mu$ mol, 1 equiv) and **1c** (2.0 mg, 3.2  $\mu$ mol, 1 equiv) were dissolved in 100  $\mu$ L of DMSO. DIPEA (5equiv) was added to each compound followed by Cy5-NHS (1.1 equiv). The reaction was stirred for 1 hour at room temperature followed by purification of the product by HPLC. The solvent was removed by rotary evaporation after which the Boc-protection on the lysine was removed by treatment with 30 % TFA in DCM for 30 minutes. Following removal of the solvent, the products were lyophilized and then reacted with QSY21-sulfo-NHS in DMSO with 5 equivalent of DIPEA for a duration of 1h. LCMS analysis showed completion of the reaction. (Supplementary Scheme 1). The final products were each purified by reverse phase HPLC using a gradient of 5 % to 50% acetonitrile over 30 minutes to yield the latent lysosomotropic effect quenched fluorescence substrates  $nQC$ , where  $n = 2, 4,$  and 6 respectively in greater than 95 % purity. LCMS: 2CQ (2) calculated for  $C_{99}H_{108}N_{10}O_{21}S_5^{2+}$ : 966.81; found; 966.8, HRMS: calculated for  $C_{99}H_{108}N_{10}O_{21}S_5^{2+}$ : 966.8159; found: 966.8122.  $^1H$  NMR (400 MHz, DMSO)  $\delta$  8.33 (t,  $J = 12.4$  Hz, 2H), 8.18 (d,  $J = 8.0$  Hz, 1H), 8.07 – 7.91 (m, 3H), 7.90 – 7.84 (m, 1H), 7.79 (s, 3H), 7.70 – 7.57 (m, 10H), 7.50 (dd,  $J = 18.9, 10.0$  Hz, 4H), 7.23 (ddt,  $J = 24.4, 16.0, 8.0$  Hz, 14H), 6.60 –

6.50 (m, 2H), 6.27 (dd, J = 13.4, 10.2 Hz, 2H), 4.89 (s, 2H), 4.43 – 4.29 (m, 4H), 4.25 (td, J = 11.1, 6.0 Hz, 1H), 4.17 – 4.00 (m, 5H), 3.28 – 3.17 (m, 8H), 3.09 – 2.94 (m, 6H), 2.87 (dt, J = 12.4, 6.4 Hz, 2H), 2.75 – 2.63 (m, 2H), 2.34 – 2.28 (m, 1H), 2.05 – 1.98 (m, 3H), 1.73 (s, 1H), 1.65 (s, 13H), 1.52 (s, 6H), 1.34 – 1.07 (m, 13H). LCMS: 4QC (6) calculated for  $C_{101}H_{112}N_{10}O_{21}S_5^{2+}$ : 980.8; found: 980.8, HRMS: calculated for  $C_{101}H_{112}N_{10}O_{21}S_5^{2+}$ : 980.8315; found: 980.8267.  $^1H$  NMR (400 MHz, DMSO)  $\delta$  8.33 (t, J = 13.5 Hz, 2H), 8.18 (d, J = 7.0 Hz, 1H), 8.03 – 7.90 (m, 3H), 7.79 (s, 3H), 7.72 (t, J = 5.4 Hz, 1H), 7.68 – 7.56 (m, 10H), 7.52 (d, J = 8.4 Hz, 4H), 7.47 (d, J = 8.7 Hz, 1H), 7.23 (dq, J = 24.2, 8.1 Hz, 14H), 6.55 (t, J = 12.3 Hz, 3H), 6.27 (dd, J = 13.8, 7.1 Hz, 2H), 4.89 (s, 2H), 4.34 (t, J = 9.5 Hz, 4H), 4.22 (dd, J = 16.2, 7.4 Hz, 1H), 4.16 – 4.00 (m, 5H), 3.28 – 3.15 (m, 8H), 3.07 – 2.90 (m, 6H), 2.86 (dd, J = 11.4, 5.5 Hz, 2H), 2.74 – 2.63 (m, 2H), 2.43 (d, J = 11.5 Hz, 2H), 2.31 (dd, J = 3.5, 1.8 Hz, 1H), 1.99 (t, J = 7.2 Hz, 2H), 1.65 (s, 14H), 1.57 – 1.43 (m, 6H), 1.36 – 1.17 (m, 15H). LCMS: 6QC (7) calculated for  $C_{103}H_{116}N_{10}O_{21}S_5^{2+}$ : 994.8; found: 994.8, HRMS: calculated for  $C_{103}H_{116}N_{10}O_{21}S_5^{2+}$ : 994.8472; found: 994.8429.  $^1H$  NMR (400 MHz, DMSO)  $\delta$  8.34 (t, J = 13.1 Hz, 2H), 8.21 – 8.12 (m, 1H), 7.96 (dt, J = 15.3, 8.5 Hz, 3H), 7.79 (s, 3H), 7.73 – 7.55 (m, 11H), 7.50 (dd, J = 19.7, 8.5 Hz, 5H), 7.23 (dq, J = 16.3, 7.7 Hz, 14H), 6.53 (s, 8H), 6.27 (dd, J = 13.8, 5.6 Hz, 2H), 4.89 (s, 2H), 4.28 (ddd, J = 19.8, 16.3, 7.2 Hz, 5H), 4.08 (ddd, J = 16.0, 11.8, 6.5 Hz, 5H), 3.27 – 3.13 (m, 7H), 3.04 – 2.90 (m, 5H), 2.86 (dd, J = 12.5, 5.9 Hz, 2H), 2.74 – 2.63 (m, 2H), 2.31 (dt, J = 3.5, 1.7 Hz, 1H), 2.00 (t, J = 7.0 Hz, 2H), 1.66 (s, 12H), 1.58 – 1.44 (m, 5H), 1.38 – 1.13 (m, 20H).



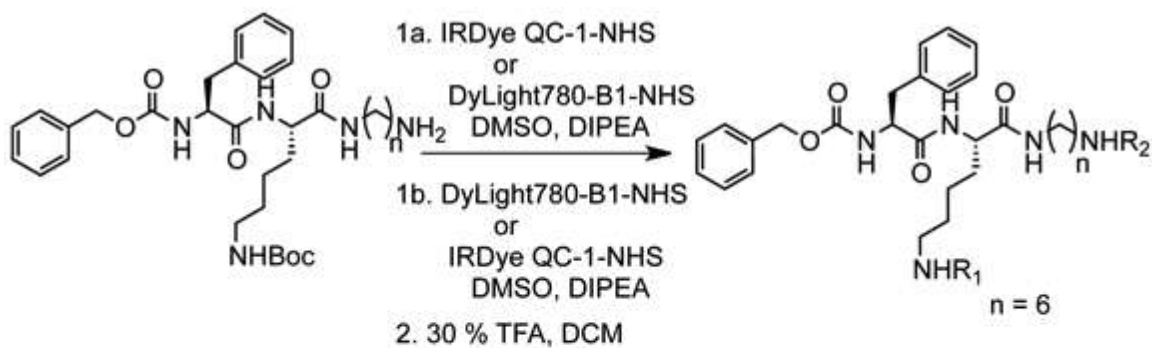

(1c) **LO1151c** :  $n = 6$

(8) **6CQNIR**:  $R_1 = \text{DyLight780-B1}$   
 $R_2 = \text{IRDye QC-1}$

(9) **6QC NIR**:  $R_1 = \text{IRDye QC-1}$ ,  
 $R_2 = \text{DyLight 780-B1}$

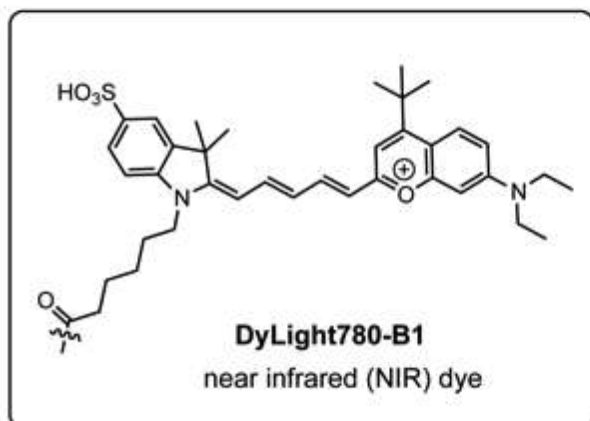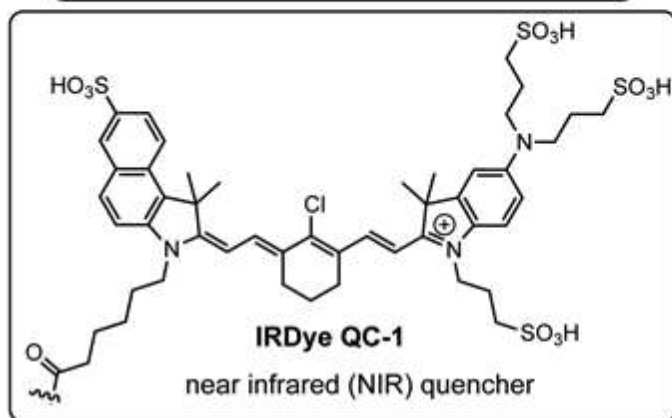

**Supplementary Scheme 2.** Synthesis of near infrared non-covalent quenched fluorescent activity based probe that is compatible with the da Vinci surgical system for FGS.

Probe **6CQNIR (8)**. Intermediate 1c (1.0 mg, 1.6  $\mu\text{mol}$ , 1 equiv) was dissolved in 100  $\mu\text{l}$  of DMSO. DIPEA (1.4  $\mu\text{l}$ , 8  $\mu\text{mol}$ ) and IRDye QC-1-NHS (2.1mg, 1.76  $\mu\text{mol}$ , 1.1 equiv) were added and reacted for 1 hour. The product was purified by Reverse phase

preparative HPLC using a gradient starting from 20 % acetonitrile to 60 % over 25 minutes. The solvent was removed by evaporation and then treated with 50 % TFA in DCM for 30 minutes to remove the Boc protection group on the lysine. The product was lyophilized to yield 1.8 mg (1.1  $\mu\text{mol}$ ) of the intermediate amine product, representing a yield of 72 % over 2 steps. This product was taken up in 100  $\mu\text{l}$  DMSO, DIPEA (5equiv) was added and then reacted for hour with DyLigth780-B1-NHS (0.94 mg, 1.21  $\mu\text{mol}$ , 1.1equiv). The final product was purified by HPLC using a gradient starting from 10 % to 60 % acetonitrile over 30 minutes at flow rate of 5 $\mu\text{l}/\text{min}$ . The product was lyophilized to obtain 1.9 mg of a dark green powder, representing a yield of 76%. LCMS (ESI) : m/z calculated for  $\text{C}_{116}\text{H}_{151}\text{ClN}_{10}\text{O}_{22}\text{S}_5^{2+}$ : 1115.96; found: 1116.1. HRMS, calculated for  $\text{C}_{116}\text{H}_{151}\text{ClN}_{10}\text{O}_{22}\text{S}_5^{2+}$ ; 1115.4643; found: 1115.4617, calculated for  $\text{C}_{116}\text{H}_{152}\text{ClN}_{10}\text{O}_{22}\text{S}_5^{3+}$ ; 744.9786; found: 743.9777

Probe **6QCNIR (9)**. Intermediate 1c (1.0 mg, 1.6  $\mu\text{mol}$ , 1 equiv) was dissolved in 100 $\mu\text{l}$  of DMSO. DIPEA (1.4  $\mu\text{l}$ , 8  $\mu\text{mol}$ ) and DyLigth780-B1-NHS (1.33 mg, 1.76  $\mu\text{mol}$ , 1.1 equiv) were added and reacted for 1 hour. The product was purified by Reverse phase preparative HPLC using a gradient starting from 20 % acetonitrile to 60 % over 25 minutes. The solvent was removed by evaporation and then treated with 50 % TFA in DCM for 30 minutes to remove the Boc protection group on the lysine. The product was lyophilized to yield 1.3 mg (1.1  $\mu\text{mol}$ ) of the intermediate amine product, representing a yield of 69 % over 2 steps. This product was taken up in 100  $\mu\text{l}$  DMSO, DIPEA (5 equiv) was added and then reacted with IRDye QC-1-NHS (1.42 mg, 1.21  $\mu\text{mol}$ , 1.1equiv) for hour. The final product was purified by HPLC using a gradient starting from 10 % to 60 % acetonitrile over 30 minutes at flow rate of 5  $\mu\text{l}/\text{min}$ . The product was lyophilized to obtain 1.5 mg of a dark green powder, representing a yield of 62 %. LCMS (ESI): m/z calculated for  $\text{C}_{116}\text{H}_{151}\text{ClN}_{10}\text{O}_{22}\text{S}_5^{2+}$ : 1115.96; found: 1116.1. HRMS, calculated for

$C_{116}H_{151}ClN_{10}O_{22}S_5^{2+}$ ; 1115.4643; found: 1115.4632, calculated for  $C_{116}H_{152}ClN_{10}O_{22}S_5^{3+}$ ;  
744.9786; found: 743.9790.

# LCMS of 2CQ (2)

Acq. File: LO0214.wiff

Sample Name: LO21A\_purity  
Sample Number: N/A

## LO2CQ (2) LCMS

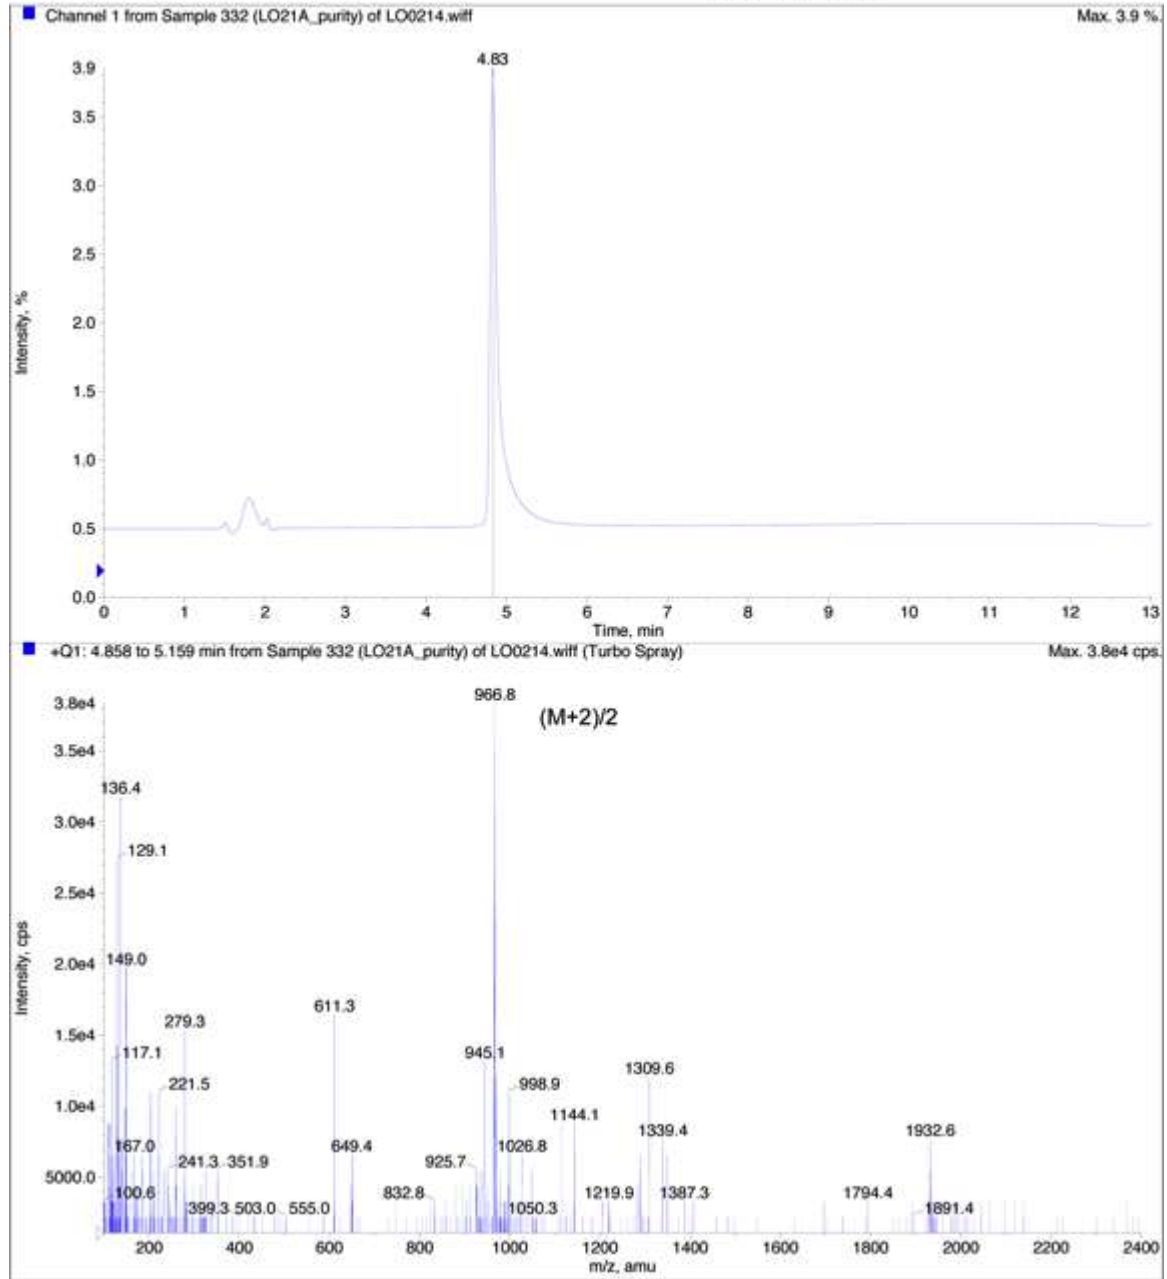

# LCMS for 4CQ (3)

Acq. File: LO0214A.wiff

Sample Name: LO21B\_purity  
Sample Number: N/A

## LO4CQ (3) LCMS

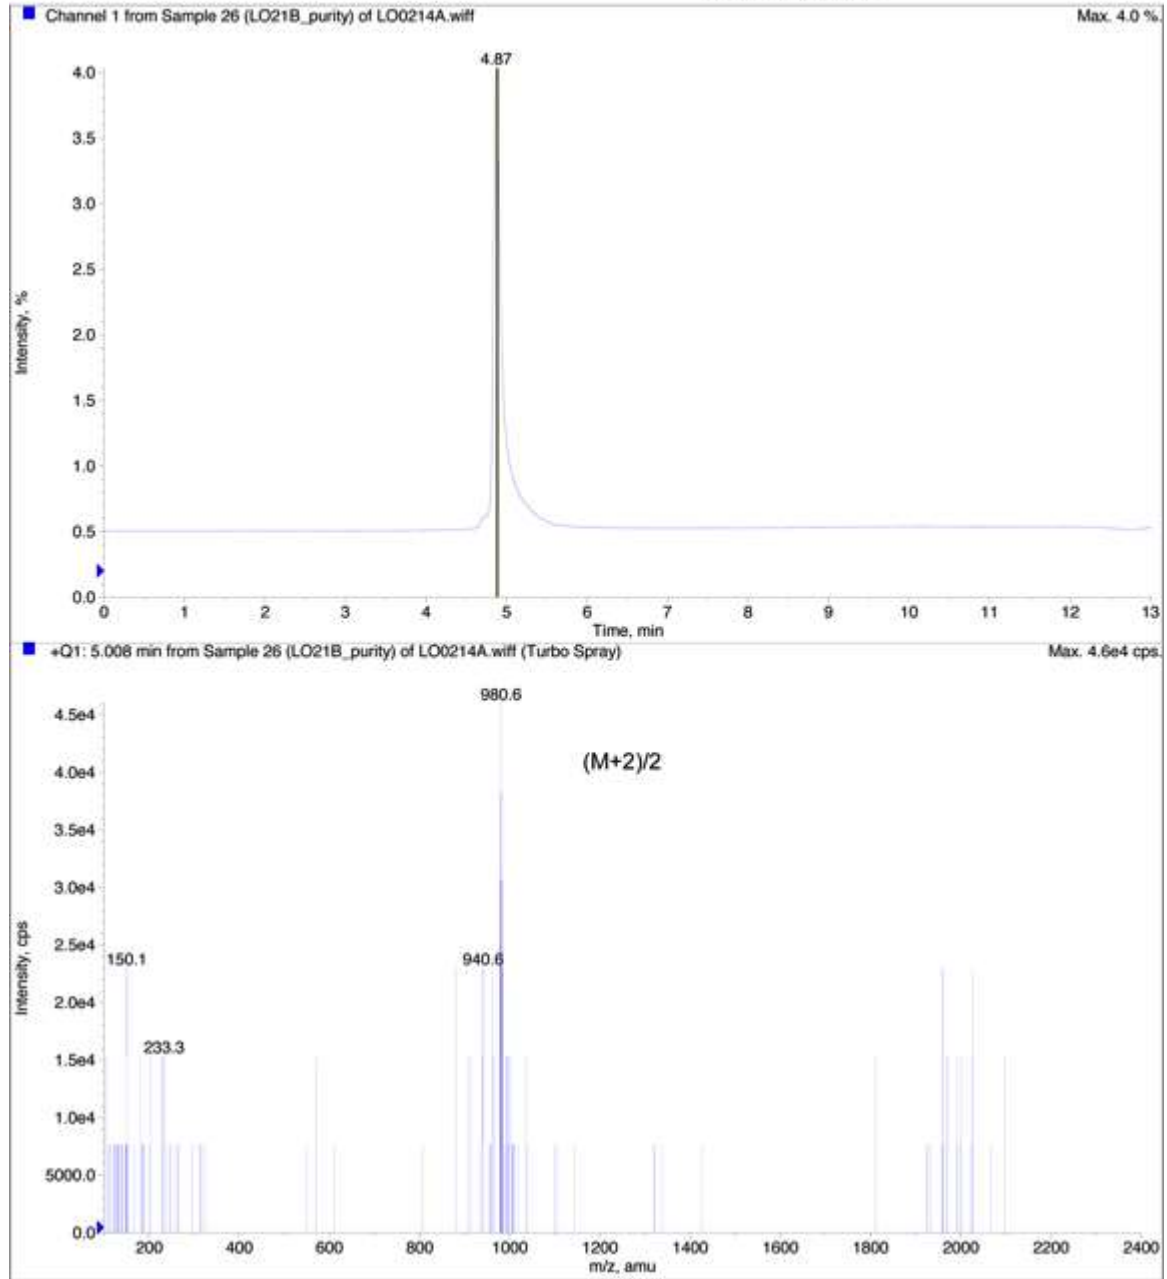

# LCMS for 6CQ (4)

Acq. File: LO0214A.wiff

Sample Name: LO21C\_purity  
Sample Number: N/A

## LO6CQ (4) LCMS

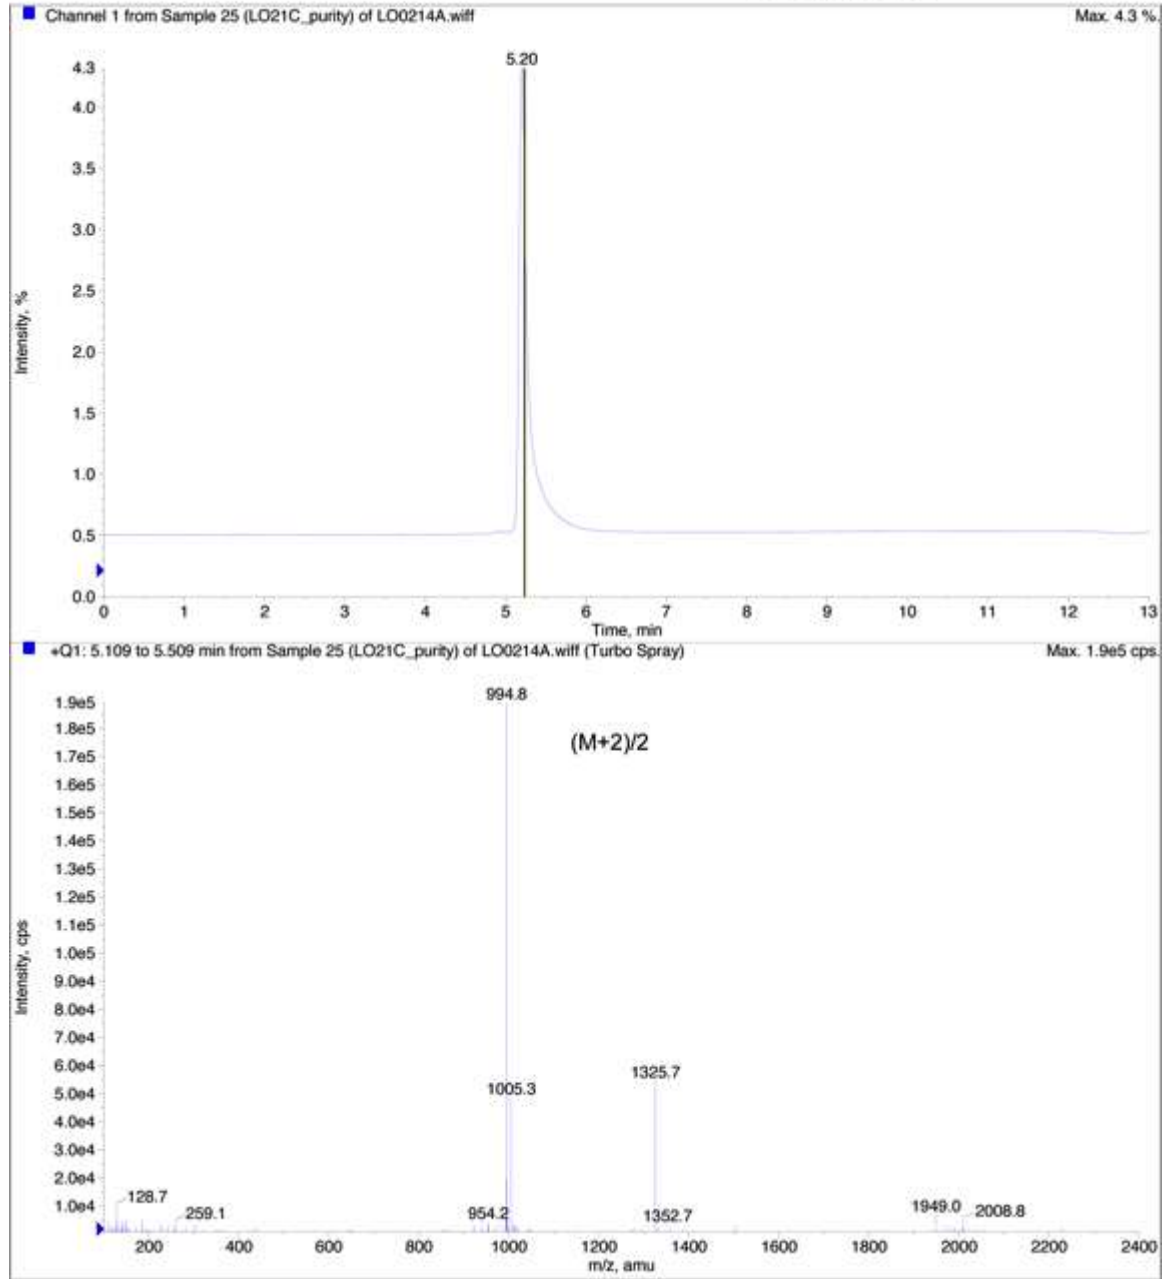

# LCMS for 2QC (5)

Acq. File: LO0214A.wiff

Sample Name: LO21A'purity  
Sample Number: N/A

## LO2QC (5) LCMS

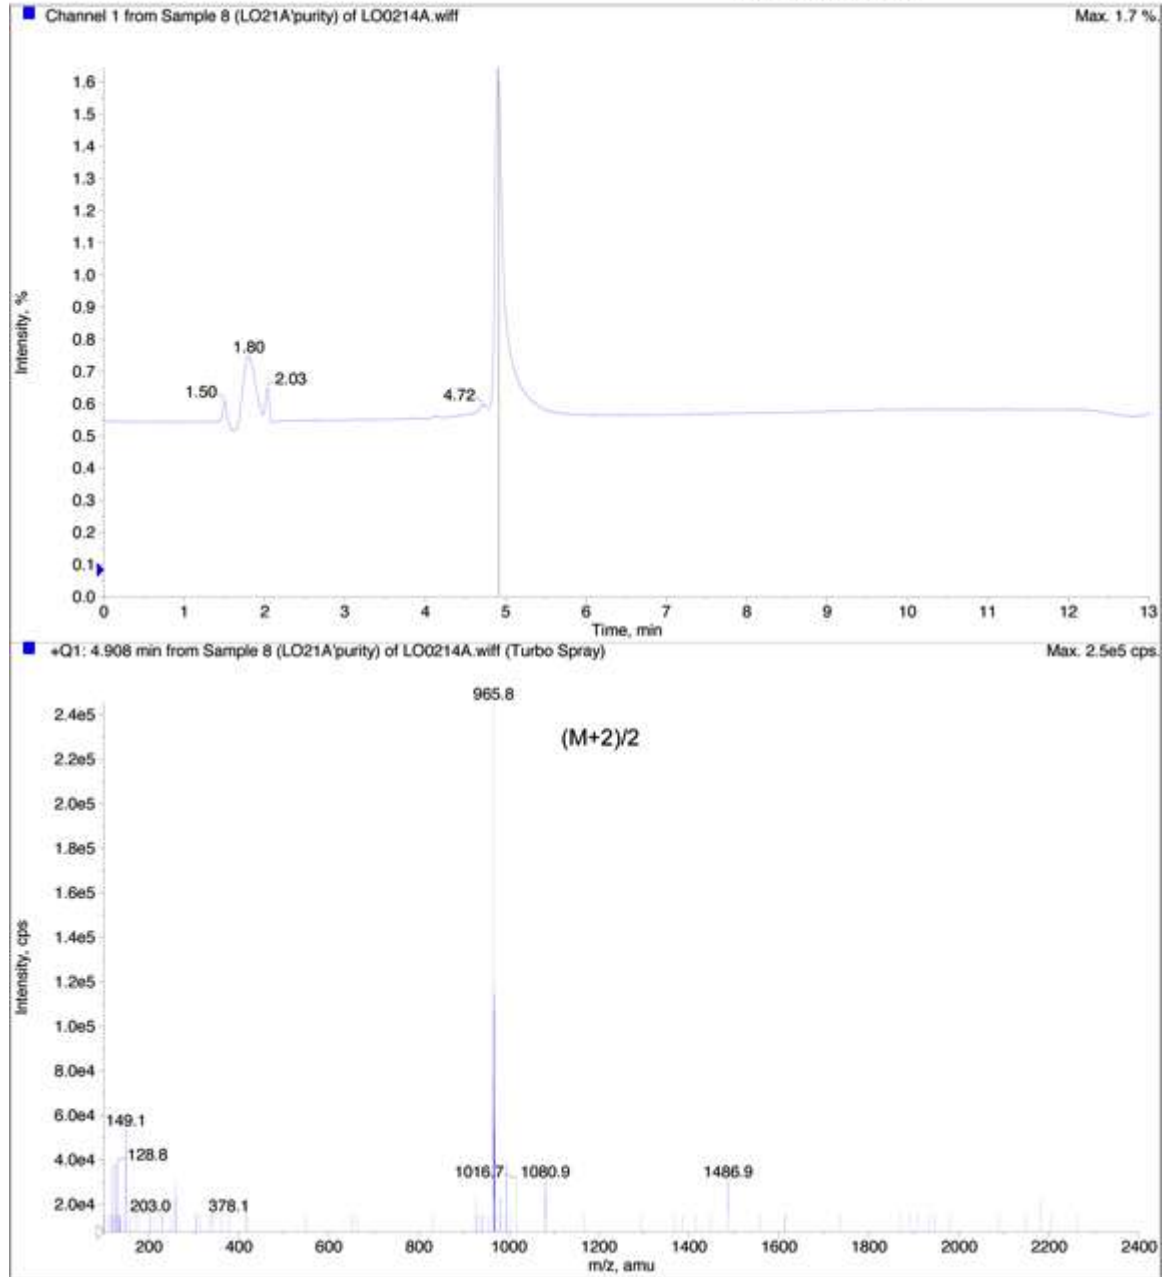

# LCMS for 4QC (6)

Acq. File: LO0214A.wiff

Sample Name: LO21B'\_purity'  
Sample Number: N/A

## LO4QC (6) LCMS

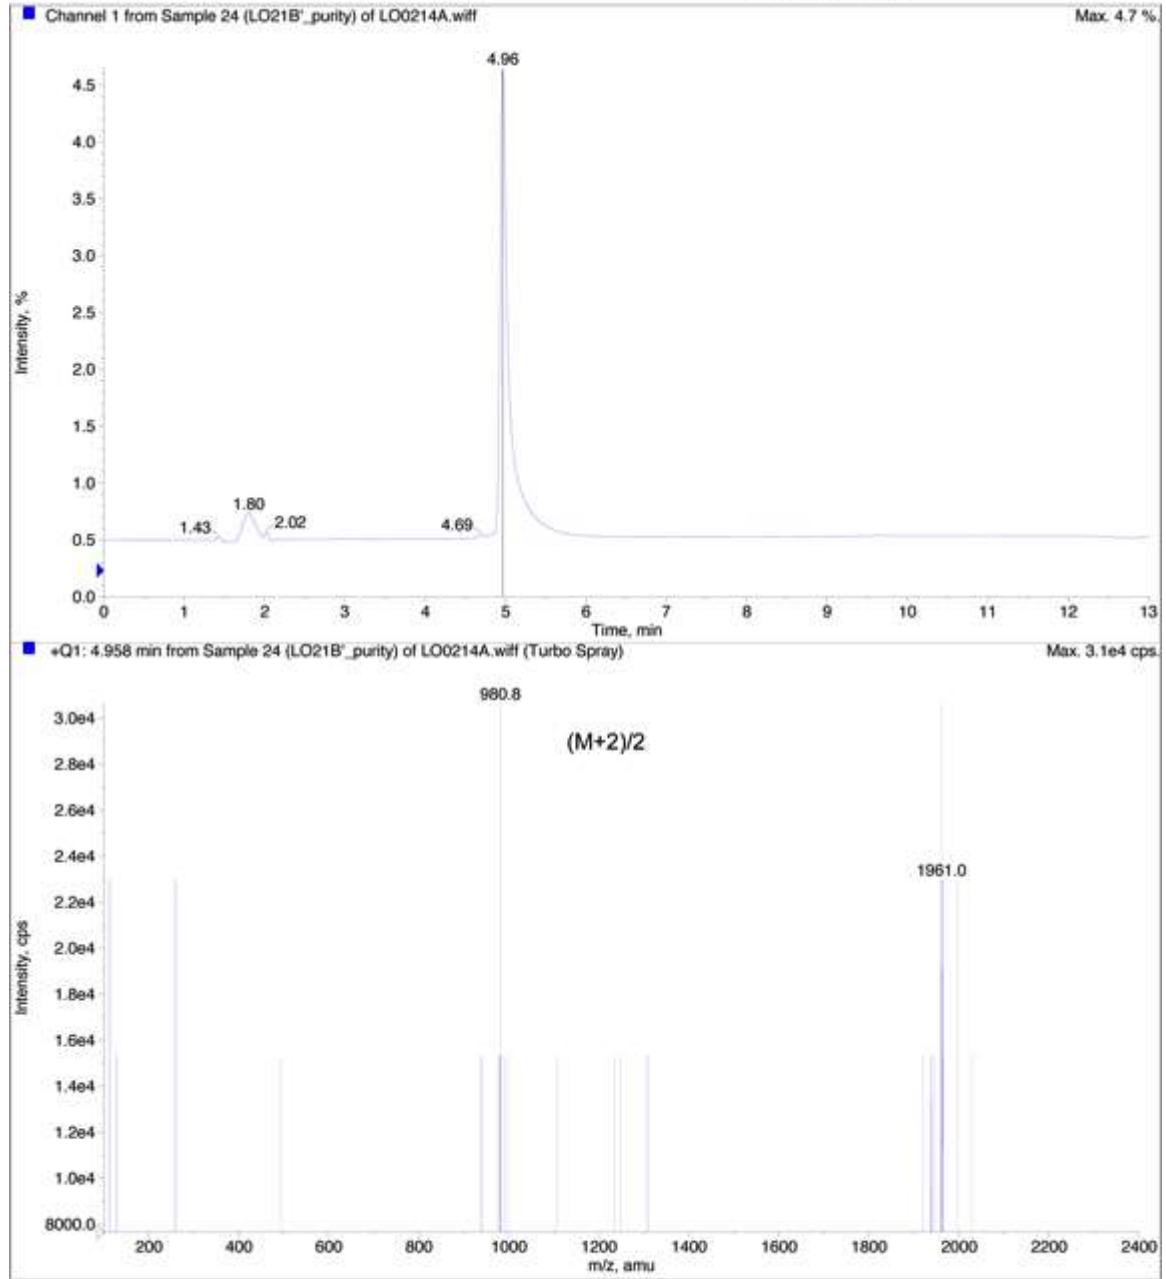



# LCMS for 6QC (7)

Acq. File: LO0214A.wiff

Sample Name: C-V10  
Sample Number: N/A

## LO6QC (7) LCMS

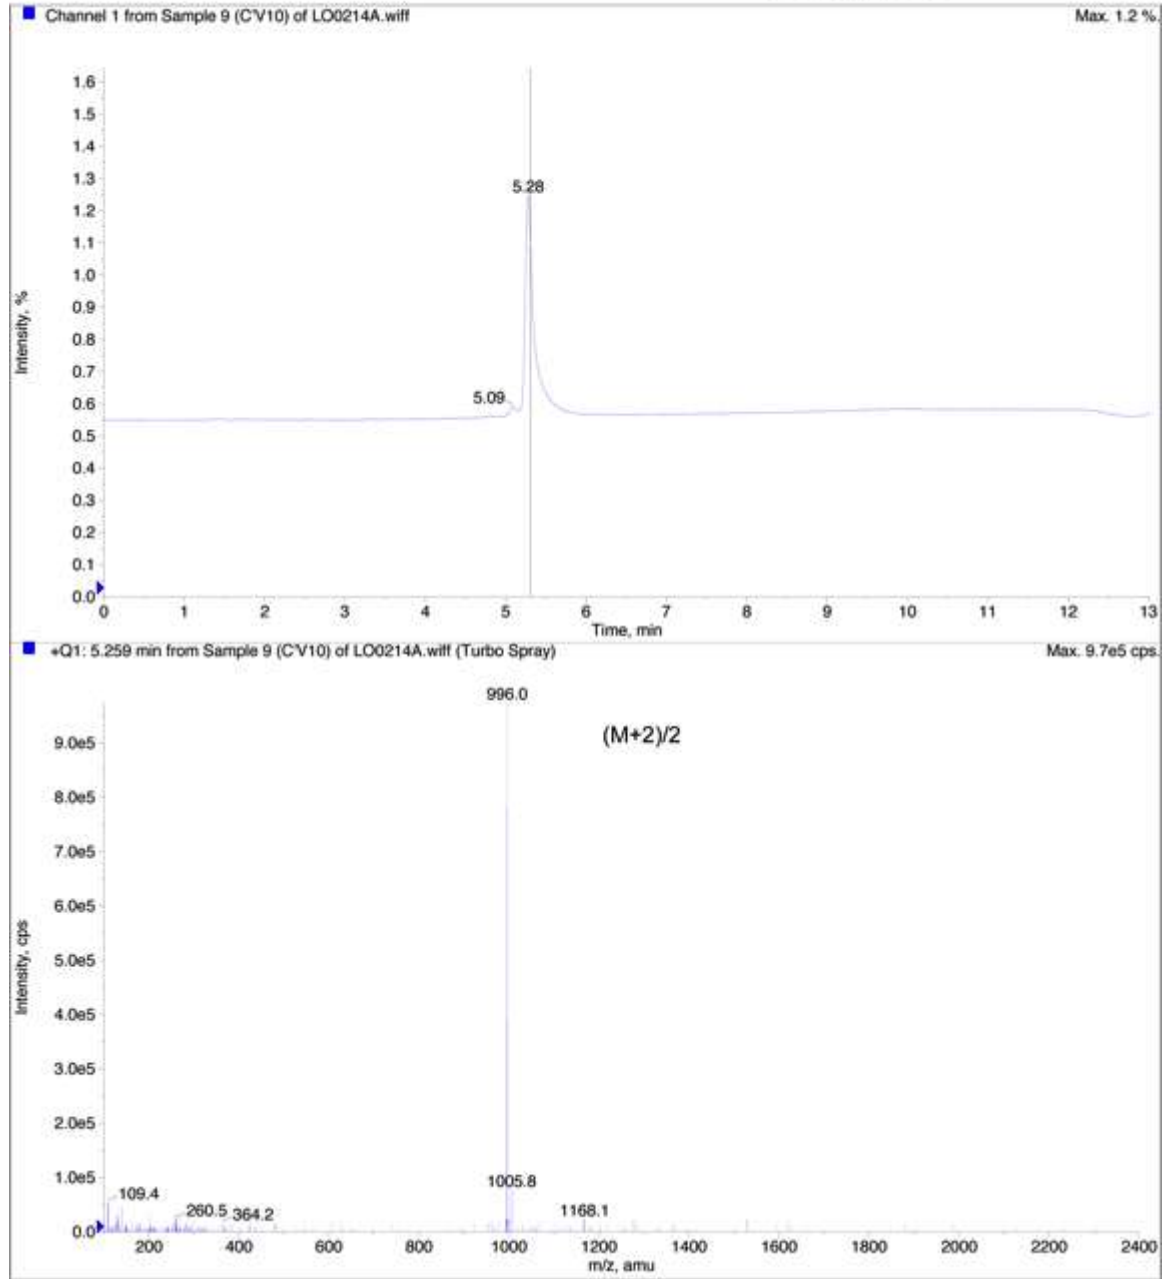

# LCMS for 6CQNIR (8)

Acq. File: LO0214A.wiff

Sample Name: LO2112  
Sample Number: N/A

## LCMS of 6CQNIR (8)

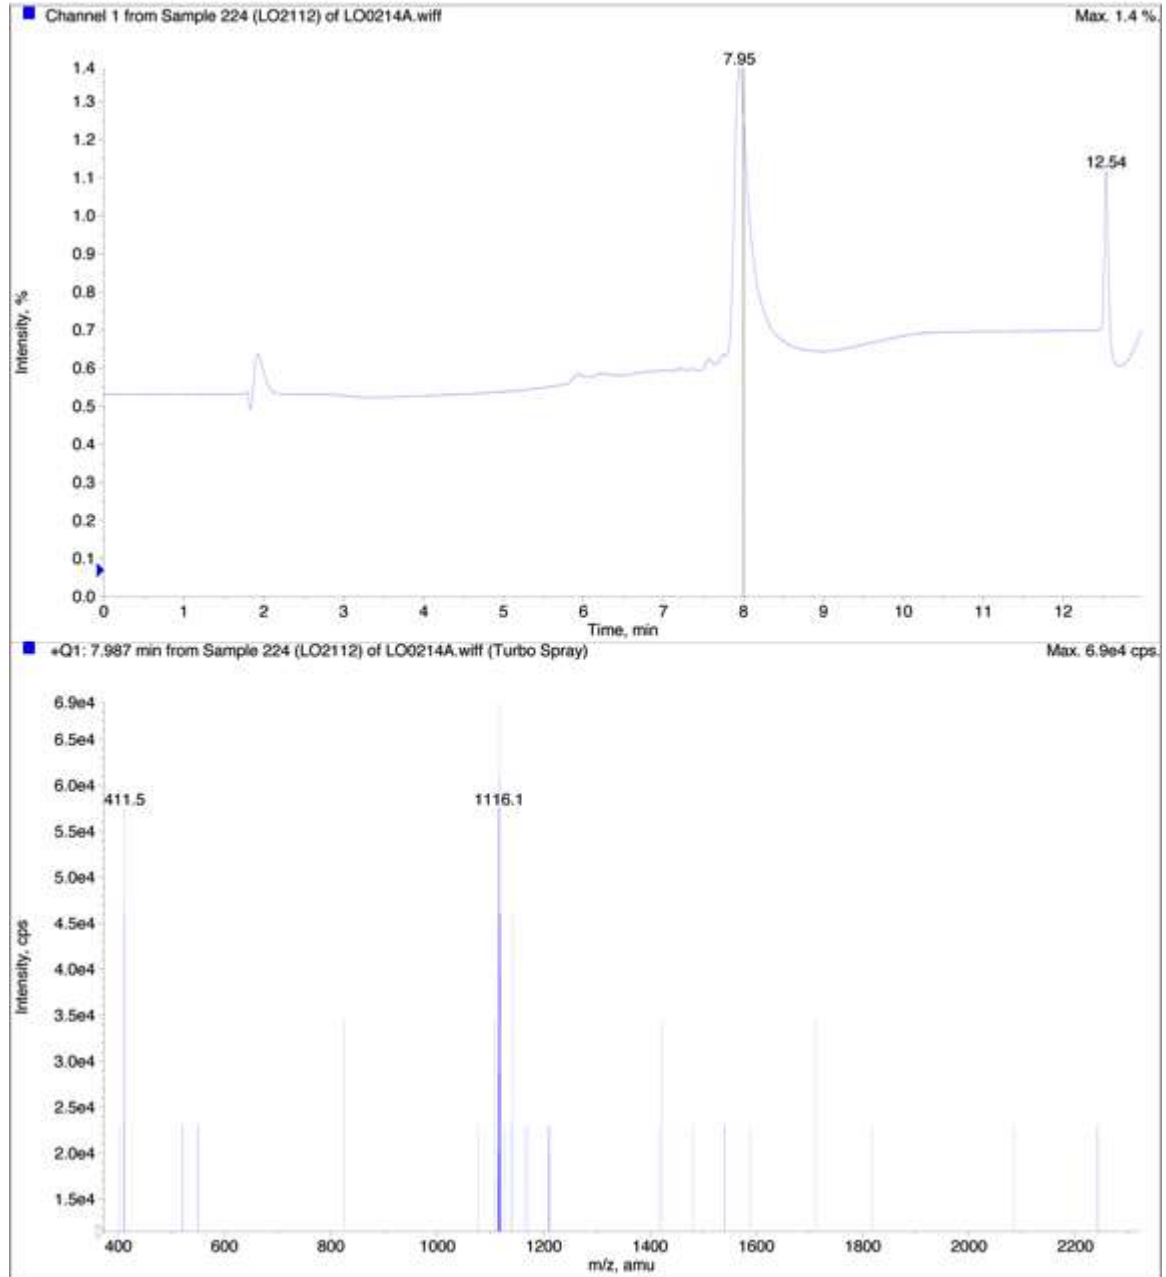

# LCMS for 6QC NIR (9)

Acq. File: LO0214A.wiff

Sample Name: LO2106  
Sample Number: N/A

## LCMS of 6QC NIR (9)

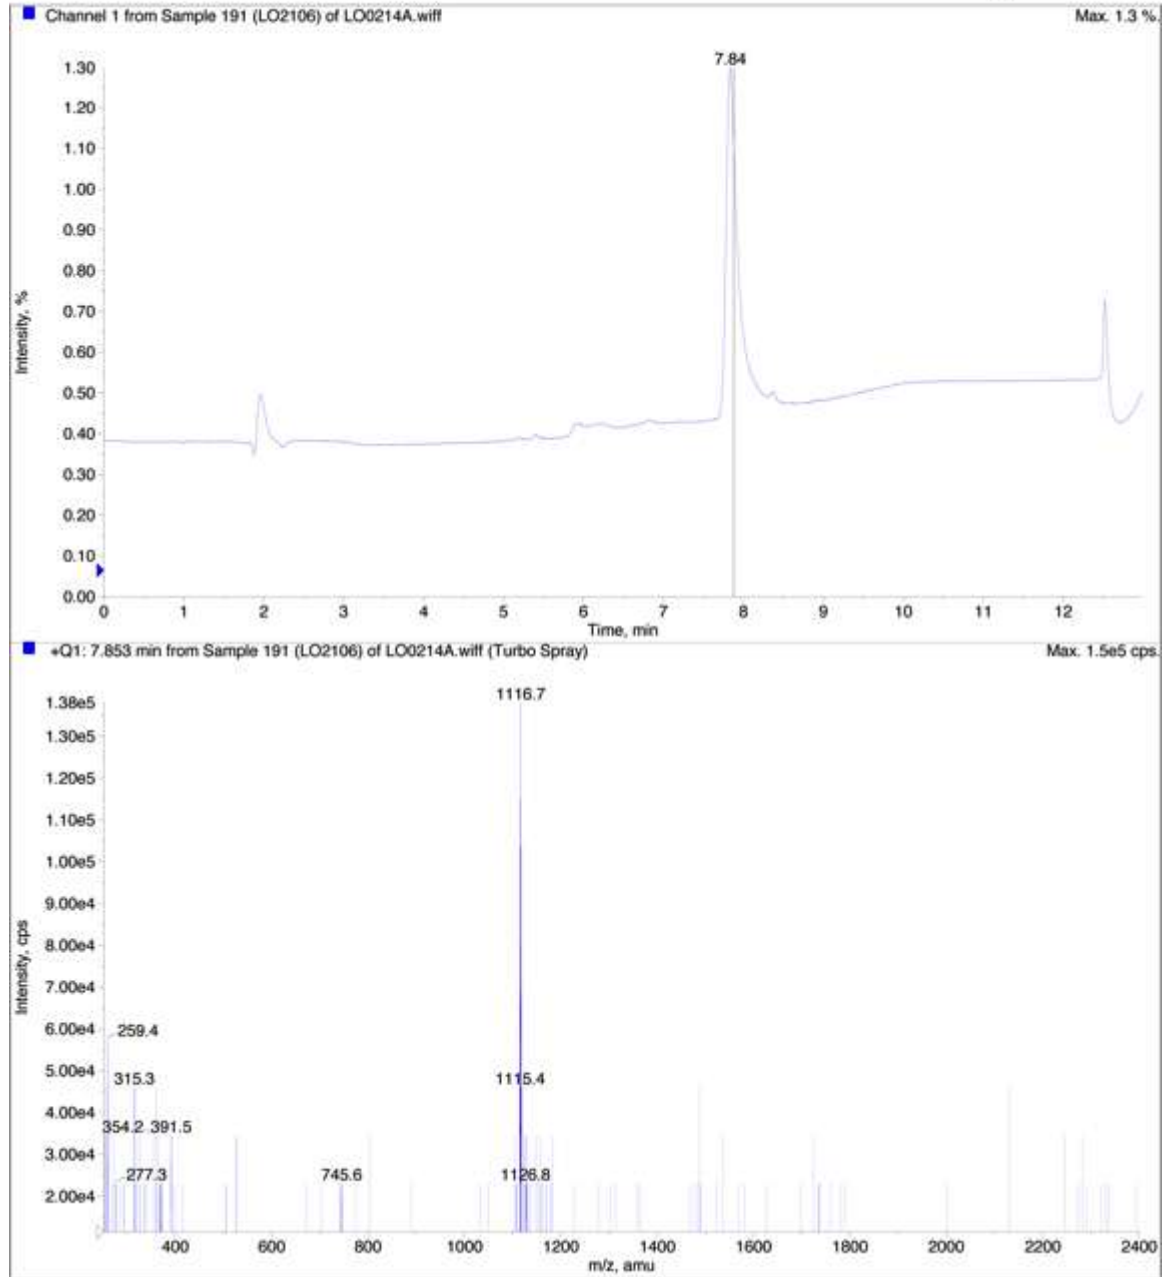

Supplement: cb5b00205_si_001.pdf [file cb5b00205_si_001.pdf]
